# Supplementary material for: Does Delayed Restoration Improve Shear Bond Strength of Different Restorative Protocols to Calcium Silicate-Based Cements?
Source: PubMed Central journal article supplement (PMC6265959; doi:10.3390/ma11112216), 2018-11-08
Supplement: materials-11-02216-s001.pdf [file materials-11-02216-s001.pdf]

# Supplementary Material: Does Delayed Restoration Improve Shear Bond Strength of Different Restorative Protocols to Calcium Silicate-Based Cements?

Paulo J. Palma, Joana Marques, Rui I. Falacho, Alexandra Vinagre, João M. Santos and João C. Ramos

**Table S1.** Materials' manufacturers, compositions, application procedures, lot numbers and expiration date information.

| Material                                                    | Manufacturer                                             | Composition                                                                                                                                                                                                                                                                 | Preparation/<br>Application<br>Procedure                                                                                                                                                                   | Lot Number | Expiration<br>Date |
|-------------------------------------------------------------|----------------------------------------------------------|-----------------------------------------------------------------------------------------------------------------------------------------------------------------------------------------------------------------------------------------------------------------------------|------------------------------------------------------------------------------------------------------------------------------------------------------------------------------------------------------------|------------|--------------------|
| Biodentine™<br>bioactive<br>dentine<br>substitute           | Septodont,<br>Saint-Maur-des-<br>Fossés Cedex,<br>France | Powder: Tricalcium silicate,<br>zirconium oxide, calcium<br>oxide, calcium carbonate,<br>and colourings.<br>Aqueous solution: Calcium<br>chloride and<br>polycarboxylate.                                                                                                   | 1. Pour 5<br>drops of<br>liquid into<br>the capsule<br>2. Place the<br>capsule on a<br>mixing<br>device<br>3. Mix for 30<br>seconds                                                                        | B19588     | 01-2019            |
| ProRoot<br>MTA® (White)<br>mineral<br>trioxide<br>aggregate | Dentsply Tulsa<br>Dental, Johnson<br>City, TN,<br>USA    | Tricalcium silicate, bismuth<br>oxide, dicalcium silicate,<br>tricalcium aluminate, and<br>calcium sulfate dehydrate or<br>gypsum                                                                                                                                           | Mixed<br>powder/liqui<br>d ratio 1:3                                                                                                                                                                       | 121780     | 02-2018            |
| Prime & Bond<br>Active™<br>universal<br>adhesive<br>system  | Dentsply<br>DeTrey GmbH,<br>Konstanz,<br>Germany         | Phosphoric acid modified<br>acrylate resin,<br>multifunctional acrylate,<br>bifunctional acrylate, acidic<br>acrylate, isopropanol, water,<br>initiator, stabilizer                                                                                                         | 1. Apply the<br>bonding<br>system to all<br>surfaces<br>2. Rest for 20<br>seconds<br>3. Air dry for<br>at least 5<br>seconds to<br>promote<br>solvent<br>evaporation<br>4. Light-cure<br>for 10<br>seconds | 1703000402 | 01-2019            |
| SDR™<br>flowable<br>composite                               | Dentsply<br>DeTrey GmbH,<br>Konstanz,<br>Germany         | Barium-alumino-fluoro-<br>borosilicate glass, strontium-<br>alumino-fluoro-silicate glass,<br>modified urethane<br>dimethacrylate resin,<br>EBPADMA, TEGDMA, CQ,<br>photoaccelerator, BHT, UV<br>stabilizer, titanium dioxide,<br>iron oxide pigments,<br>fluorescing agent | 1. Dispense<br>SDR™<br>material<br>2. Light-cure<br>for at least 20<br>seconds                                                                                                                             | 02023      | 02-2020            |

|                                                                    |                                    |                                                                                                                                                    |                                      |         |         |
|--------------------------------------------------------------------|------------------------------------|----------------------------------------------------------------------------------------------------------------------------------------------------|--------------------------------------|---------|---------|
| GC Fuji IX GP<br>(A3)<br>glass<br>ionomer<br>restorative<br>cement | GC<br>Corporation,<br>Tokyo, Japan | Powder:<br>Aluminofluorosilicate glass,<br>polyacrylic acid powder.<br>Liquid: Polyacrylic acid,<br>distilled water, polybasic<br>carboxylic acid. | Mixed<br>powder/liqui<br>d ratio 1:1 | 1610031 | 10-2019 |
|--------------------------------------------------------------------|------------------------------------|----------------------------------------------------------------------------------------------------------------------------------------------------|--------------------------------------|---------|---------|

---

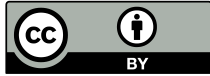

© 2018 by the authors. Licensee MDPI, Basel, Switzerland. This article is an open access article distributed under the terms and conditions of the Creative Commons Attribution (CC BY) license (<http://creativecommons.org/licenses/by/4.0/>).
